# Supplementary material for: The Mechanism of Manganese Ferrite Nanomaterials Promoting Drought Resistance in Rice
Source: MDPI journal article supplement (doi:10.3390/nano13091484), 2023-04-26
Supplement: s1 [file s1]

# The Mechanism of Manganese Ferrite Nanomaterials Promoting Drought Resistance in Rice

Le Yue <sup>1,2</sup>, Budiao Xie <sup>1,2</sup>, Xuesong Cao <sup>1,2</sup>, Feiran Chen <sup>1,2</sup>, Chuanxi Wang <sup>1,2</sup>, Zhenggao Xiao <sup>1,2</sup>, Liya Jiao <sup>1,2</sup> and Zhenyu Wang <sup>1,2,\*</sup>

<sup>1</sup> Institute of Environmental Processes and Pollution Control and School of Environment and Civil Engineering, Jiangnan University, Wuxi 214122, China;

<sup>2</sup> Jiangsu Engineering Laboratory for Biomass Energy and Carbon Reduction Technology, Wuxi 214122, China

\* Correspondence: wang0628@jiangnan.edu.cn; Tel.: +86-0510-8591-1123

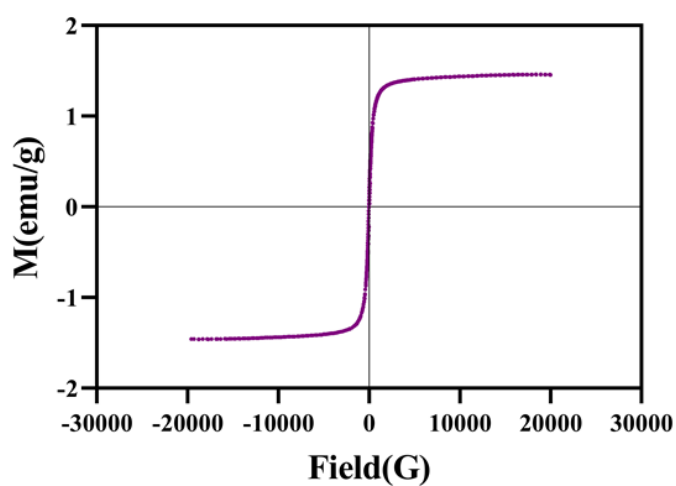

Figure S1. VSM curves of MnFe<sub>2</sub>O<sub>4</sub> NMs.

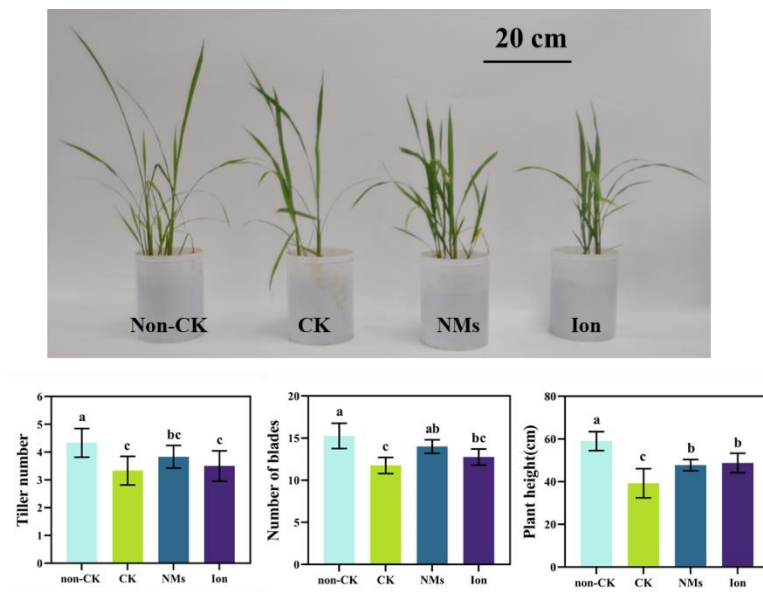

**Figure S2.** Rice growth as affected with  $10 \text{ mg} \cdot \text{kg}^{-1}$   $\text{MnFe}_2\text{O}_4$  NMs and equivalent ion control under drought stress. The values are given as mean value  $\pm$  standard deviation (n=5). Different letters mean significant differences ( $p < 0.05$ ).

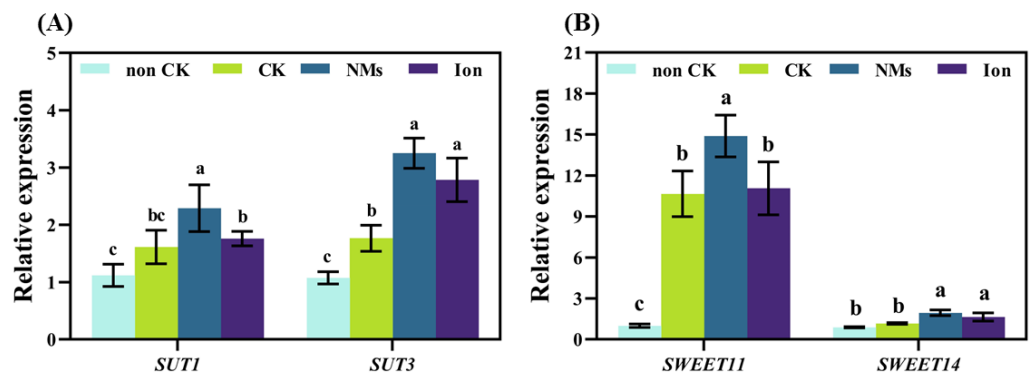

**Figure S3.** Relative expressions of SUT (A) and SWEET (B) in roots respond to  $10 \text{ mg} \cdot \text{kg}^{-1}$   $\text{MnFe}_2\text{O}_4$  NMs and equivalent ion control under drought. The values are given as mean value  $\pm$  standard deviation (n=5). Different letters mean significant differences ( $p < 0.05$ ).

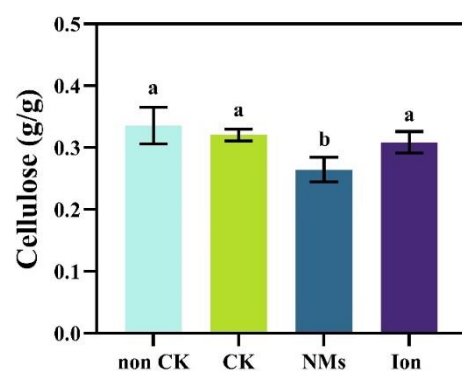

**Figure S4.** Cellulose content in rice roots responds to  $10 \text{ mg} \cdot \text{kg}^{-1}$   $\text{MnFe}_2\text{O}_4$  NMs and equivalent ion control under drought. The values are given as mean value  $\pm$  standard deviation ( $n=5$ ). Different letters mean significant differences ( $p < 0.05$ ).

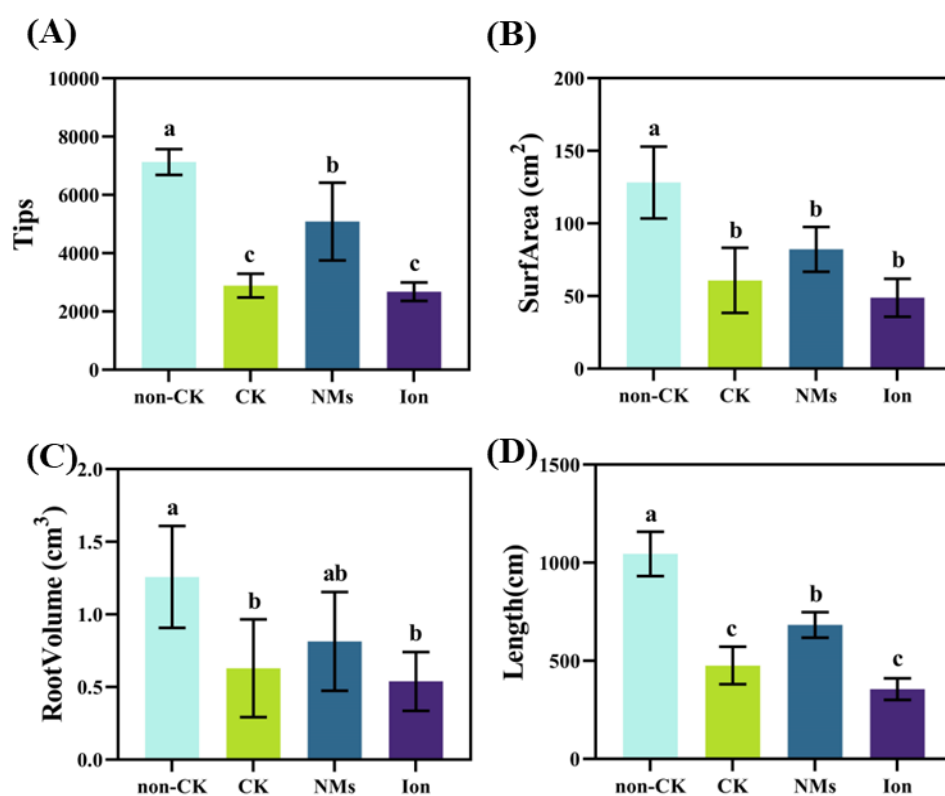

**Figure S5.** Root growth responds to 10 mg·kg<sup>-1</sup> MnFe<sub>2</sub>O<sub>4</sub> NMs and equivalent ion control under drought. (A) Root tip number, (B) root surface area, (C) root volume, and (D) root length. The values are given as mean value ± standard deviation (n=5). Different letters mean significant differences (*p* < 0.05).

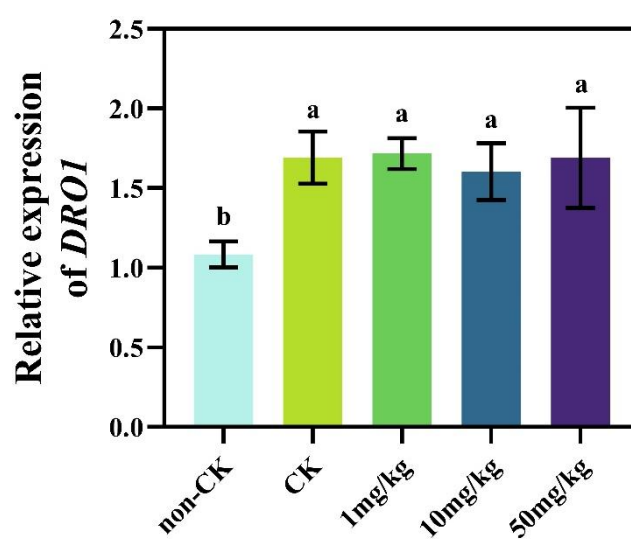

**Figure S6.** Relative expression of *DRO1* responds to 10 mg·kg<sup>-1</sup> MnFe<sub>2</sub>O<sub>4</sub> NMs and equivalent ion control under drought. The values are given as mean value ± standard deviation (n=5). Different letters mean significant differences ( $p < 0.05$ ).

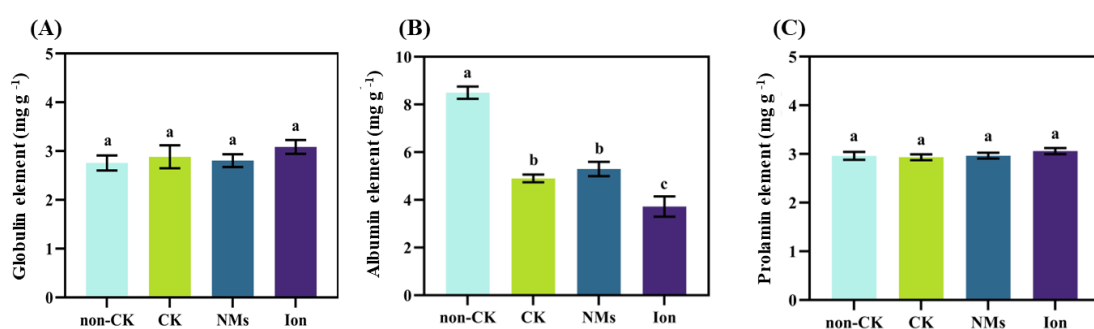

**Figure S7.** Globulins (A), albumin (B), and prolamin (C) contents respond to  $10 \text{ mg} \cdot \text{kg}^{-1} \text{ MnFe}_2\text{O}_4$  NMs and equivalent ion control under drought. The values are given as mean value  $\pm$  standard deviation ( $n=5$ ). Different letters mean significant difference ( $p < 0.05$ ).

**Table S1.** Primer set list.

| <b>Primer</b>    | <b>Sequence (5'-3')</b>    |
|------------------|----------------------------|
| <i>AUX1-F</i>    | GCCTGCGCGAGTAACATCTA       |
| <i>AUX1-R</i>    | CAGCACCAGCTTGGTTGGAC       |
| <i>AUX2-F</i>    | GCCTGCGCGAGTAACATCTA       |
| <i>AUX2-R</i>    | CAGCACCAGCTTGGTTGGAC       |
| <i>AUX3-F</i>    | TTGGAATTTTGCAGGTGGCG       |
| <i>AUX3-R</i>    | ACCACTGGATGACGTGGTTC       |
| <i>PIN1a-F</i>   | TCATCTGGTCGCTCGTCTGC       |
| <i>PIN1a-R</i>   | CGAACGTCGCCACCTTGTTT       |
| <i>PIN2-F</i>    | CAGGGCTAGGAATGGCTATGT      |
| <i>PIN2-R</i>    | GCAAACACAAACGGGACAA        |
| <i>DRO1-F</i>    | GCAAGAAGCAAATCGGTTTCC      |
| <i>DRO1-R</i>    | GAATTCATCCTTTCGACAATCTGA   |
| <i>OR1-F</i>     | ACGATGCTTCACAAGAGGATGA     |
| <i>OR1-R</i>     | CGGCTTATCCTCAAGATAGTATTTCC |
| <i>Ubi-F</i>     | AACCAGCTGAGGCCCAAGA        |
| <i>Ubi-R</i>     | ACGATTGATTTAACCAGTCCATGA   |
| <i>CLE25-F</i>   | GGTAAGGATGTGAATGTTTCATGT   |
| <i>CLE25-R</i>   | TCTGCTTTCCTGTTGGGATAGG     |
| <i>NCED3-F</i>   | CACGATTTCGCGATCAGAGAGA     |
| <i>NCED3-R</i>   | CCGGCAGCTTGAAACGA          |
| <i>SUT1-F</i>    | CATTCATCCTCTACGACACTGA     |
| <i>SUT1-R</i>    | CACAATCGAATTCAGTAGCAGG     |
| <i>SUT3-F</i>    | CTCGTTGAGTTAACTTCGTTGG     |
| <i>SUT3-R</i>    | TATTTACAGGGCCTGCCATAAA     |
| <i>SWEET11-F</i> | AAGACCAAGAGCGTCGAGTT       |
| <i>SWEET11-R</i> | ACGTTTCGGGTACATGACGTA      |
| <i>SWEET14-F</i> | TTCTTGGTTGGGTCTGCGTT       |
| <i>SWEET14-R</i> | GAGGGAGAAGGAGAGGCGAGA      |

**Table S2** Zeta potential and hydraulic diameter of MnFe<sub>2</sub>O<sub>4</sub> NMs.

|                    | MnFe <sub>2</sub> O <sub>4</sub> NMs |
|--------------------|--------------------------------------|
| hydraulic diameter | 982.0 ± 83.6nm                       |
| Zeta potential     | -27.0 ± 1.2mV                        |

**Table S3.** Contents of nutrient elements in rice after MnFe<sub>2</sub>O<sub>4</sub> NM application.

| treatments                             |                        | P              | K               | Ca             | Mg             | S               | Fe              | Mn            | Cu          | Zn              |
|----------------------------------------|------------------------|----------------|-----------------|----------------|----------------|-----------------|-----------------|---------------|-------------|-----------------|
| (MnFe <sub>2</sub> O <sub>4</sub> NMs) |                        |                |                 |                |                |                 |                 |               |             |                 |
| shoot                                  | Non-CK                 | 1096.5±68.4a   | 8714.3±789.8a   | 2745.3±362.0a  | 1968.8±129.8b  | 4769.5±1256.0ab | 19388.7±987.3b  | 479.7±18.9a   | 30.5±3.5ab  | 19388.7±987.3b  |
|                                        | CK                     | 590.1±26.9d    | 5740.7±125.0b   | 2709.1±355.2a  | 1780.4±134.7b  | 2616.7±451.3c   | 20203.4±948.0b  | 227.2±28.80b  | 24.5±3.02b  | 20203.4±948.02b |
|                                        | 1 mg·kg <sup>-1</sup>  | 661.1±76.7cd   | 6030.8±510.9b   | 3369.9±1706.6a | 1469.8±170.1b  | 3519.1±1226.4b  | 19026.0±2333.1b | 221.8±41.9b   | 46.9±19.5ab | 19026.0±2333.1b |
|                                        | 10 mg·kg <sup>-1</sup> | 749.5±21.1b    | 5033.6±567.3b   | 2673.4±514.7a  | 1807.4±696.3b  | 3920.2±1875.5b  | 23426.7±2315.3a | 348.6±208.2ab | 47.8±20.5ab | 23426.7±2315.3a |
|                                        | 50 mg·kg <sup>-1</sup> | 639.2±70.2c    | 5513.3±949.6b   | 4992.5±2063.1a | 2865.3±249.8a  | 5155.6±811.8a   | 5597.0±1585.8c  | 213.1±206.9b  | 61.0±26.0a  | 5597.0±1585.8c  |
| root                                   | Non-CK                 | 1871.5±197.1a  | 33501.3±3875.8b | 5365.2±517.3a  | 2253.9±292.6bc | 2561.7±128.3c   | 165.9±9.1a      | 273.2±61.9b   | 11.3±0.8c   | 165.9±9.1a      |
|                                        | CK                     | 1478.7±82.8bc  | 32795.8±1784.5b | 3518.4±699.4a  | 2085.1±62.0c   | 3052.1±174.4bc  | 128.8±9.9a      | 164.9±48.0b   | 12.2±0.5bc  | 128.8±9.9a      |
|                                        | 1 mg·kg <sup>-1</sup>  | 1408.4±75.3c   | 34237.9±2380.1b | 5029.8±1506.8a | 3032.3±461.2a  | 3124.0±204.5bc  | 163.8±23.1a     | 329.5±73.4b   | 11.6±2.5c   | 163.8±23.1a     |
|                                        | 10 mg·kg <sup>-1</sup> | 1687.8±106.7ab | 41509.0±1071.6a | 3471.7±1056.4a | 3045.5±696.3a  | 3659.2±531.9ab  | 144.4±4.5a      | 242.1±72.6b   | 17.2±3.0a   | 144.4±4.5a      |
|                                        | 50 mg·kg <sup>-1</sup> | 1564.5±62.2bc  | 32043.4±4993.0b | 5190.2±1700.1a | 2739.8±232.9ab | 3457.9±514.8ab  | 140.0±12.3a     | 644.3±239.8a  | 15.8±1.7 a  | 140.0±26.0a     |
